# Supplementary material for: Clinical features, Outcomes and Molecular Profiles of Drug Resistance in Tuberculous Meningitis in non-HIV Patients
Source: PubMed Central journal article supplement (PMC4703954; doi:10.1038/srep19072), 2016-01-07

**Clinical features, Outcomes and Molecular Profiles of Drug Resistance in  
Tuberculous Meningitis in non-HIV Patients**

Jingya Zhang<sup>a,1</sup>, Xuejiao Hu<sup>a,1</sup>, Xin Hu<sup>a,2</sup>, Yuanxin Ye<sup>1</sup>, Mengqiao Shang<sup>1</sup>, Yunfei An<sup>1</sup>,  
Haimei Gou<sup>1</sup>, Zhenzhen Zhao<sup>1</sup>, Wu Peng<sup>1</sup>, Xingbo Song<sup>1</sup>, Yanhong Zhou<sup>1</sup>, Mei Kang<sup>1</sup>, Yi  
Xie<sup>1</sup>, Xuerong Chen<sup>3</sup>, Xiaojun Lu<sup>1,\*</sup>, Binwu Ying<sup>1,\*</sup>, Lanlan Wang<sup>1,\*</sup>

**Supplementary Figure S1.** Flowchart of the method used for the diagnosis of patients with tuberculous meningitis.

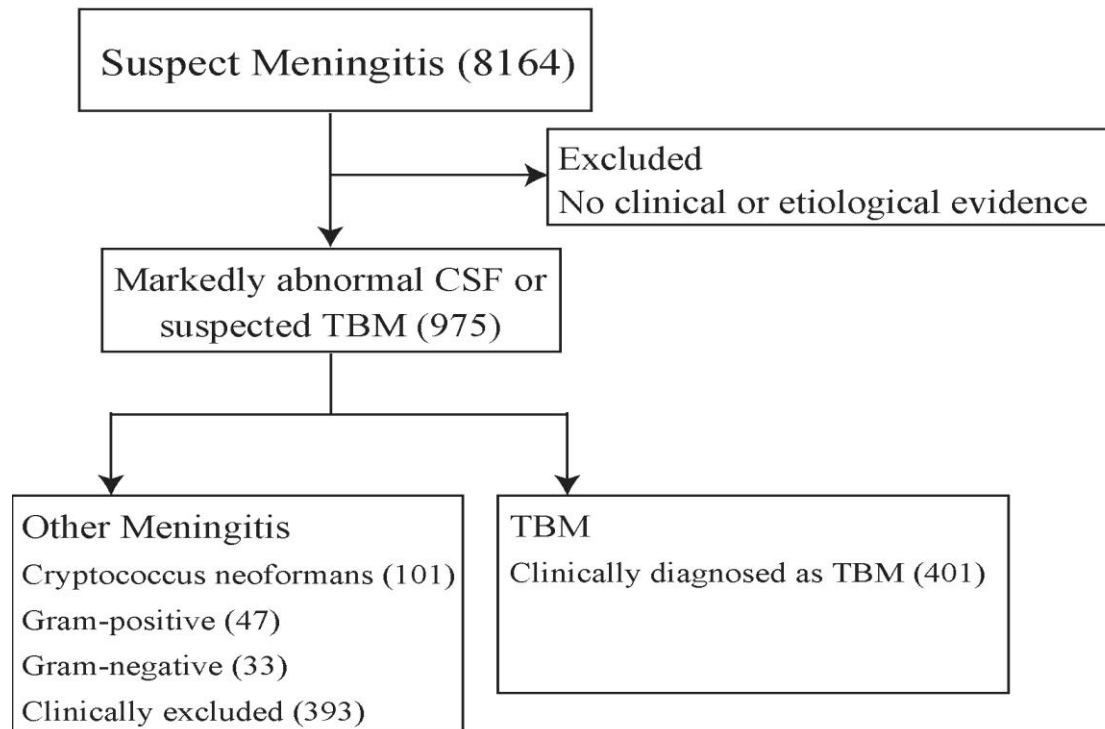

Supplement: srep19072-s1.pdf [file srep19072-s1.pdf]
